# Supplementary material for: Optoelectronic synaptic transistors based on upconverting nanoparticles
Source: Royal Society of Chemistry journal article supplement (doi:10.1039/d0tc04115g), 2020-11-21
Supplement: d0tc04115g1.pdf [file d0tc04115g1.pdf]

## Electronic Supporting Information

Optoelectronic synaptic transistors based on upconversion nanoparticles

Haixia Lian, ‡<sup>a</sup> Qiufan Liao, ‡<sup>b</sup> Baidong Yang,<sup>b</sup> Yongbiao Zhai,<sup>b</sup> Su-Ting Han<sup>\*b</sup> and Ye Zhou<sup>\*a</sup>

<sup>a</sup>Institute for Advanced Study, Shenzhen University Shenzhen 518060, P. R. China

<sup>b</sup>Institute of Microscale optoelectronics and College of Electronics and Information Engineering, Shenzhen University, Shenzhen 518060, P. R. China

‡ Haixia Lian and Qiufan Liao contributed equally to this work.

**Corresponding E-mails:** yezhou@szu.edu.cn (**Ye Zhou**); sutinghan@szu.edu.cn (**Su-Ting Han**)

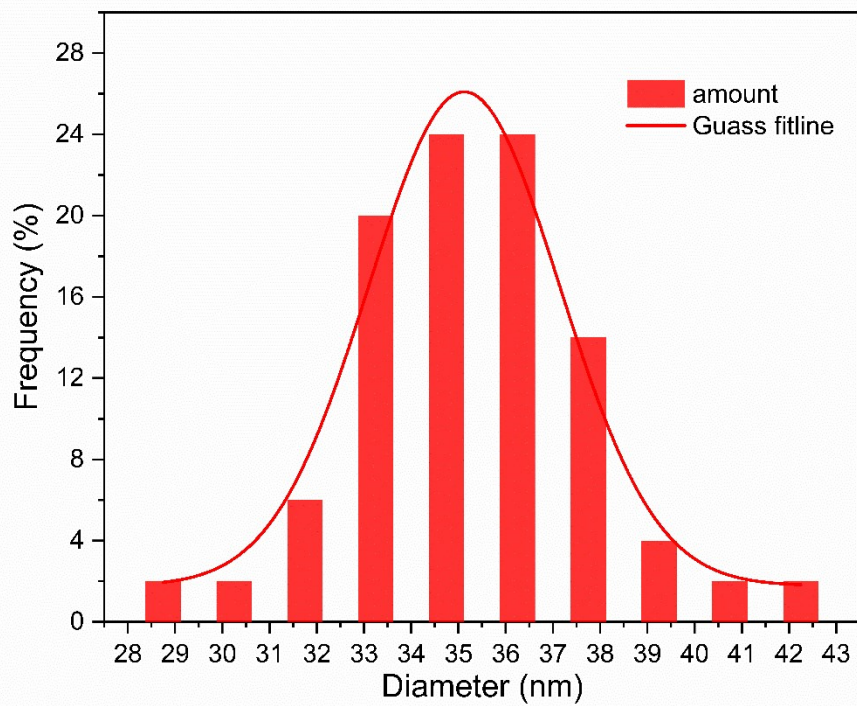

**Fig. S1.** Statistical particle size distribution of 50 nanoparticles.

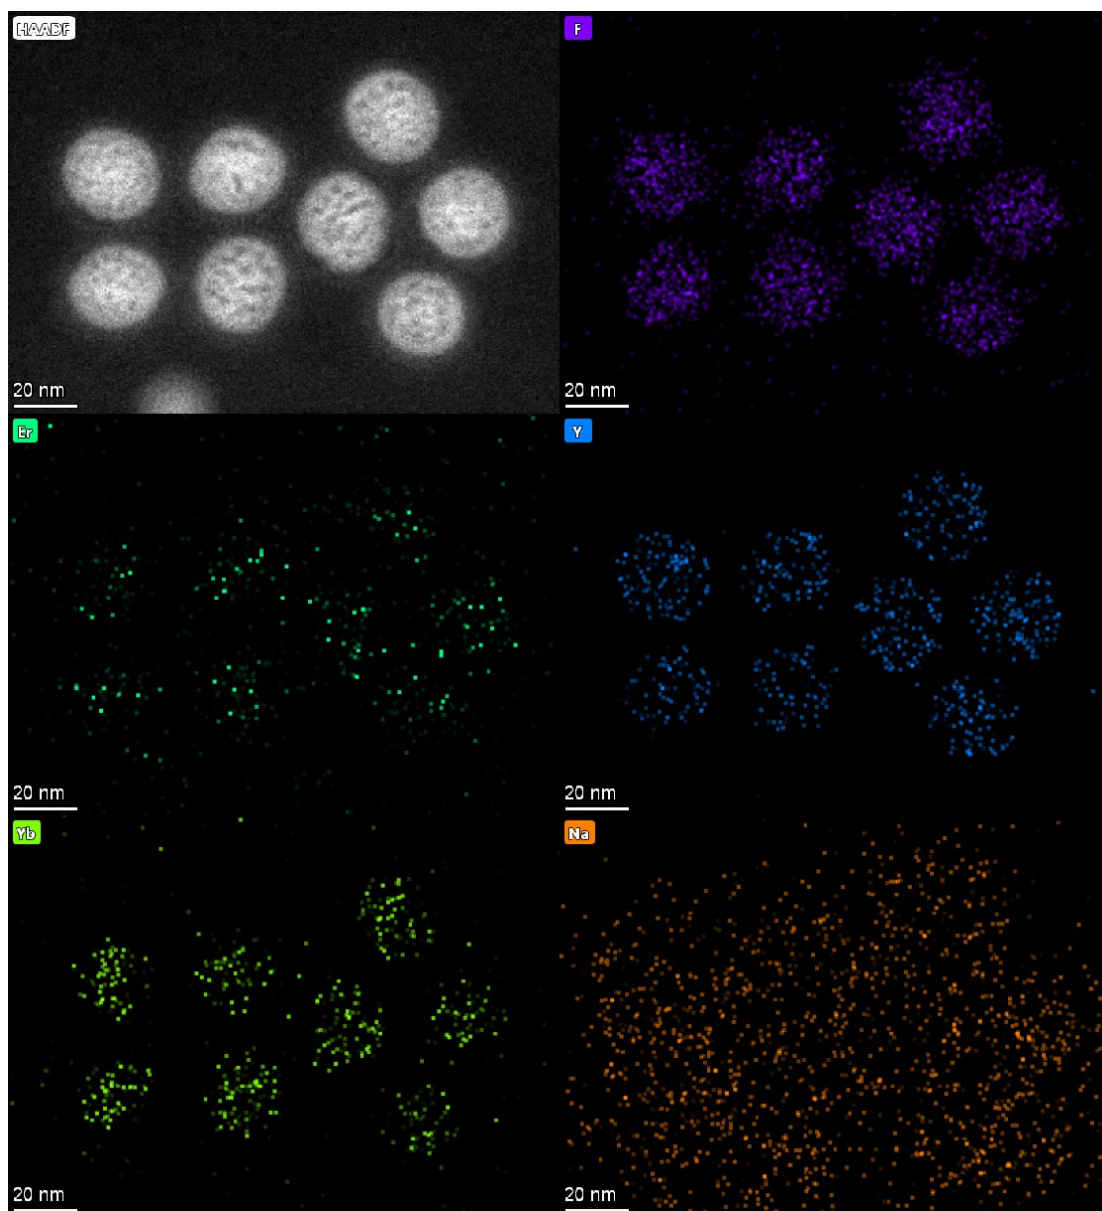

**Fig. S2.** High-angle annular dark-field (HAADF) image and corresponding elemental mapping.

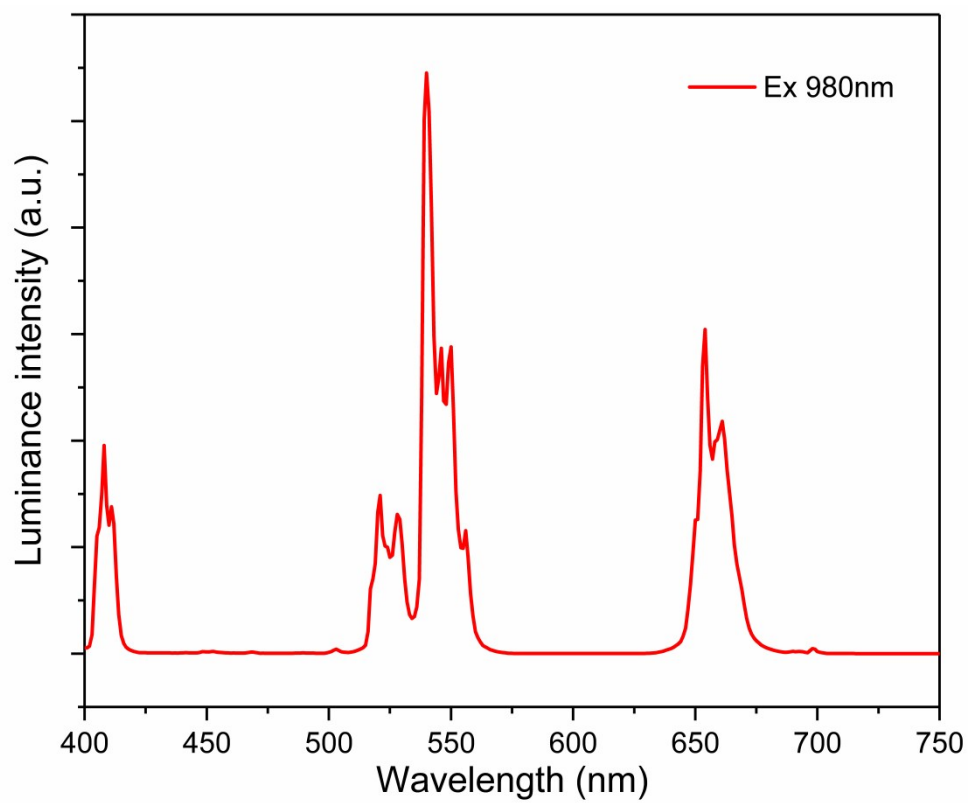

**Fig. S3.** PL emission spectrum of NaYF<sub>4</sub>:Yb<sup>3+</sup>/Er<sup>3+</sup>@NaYF<sub>4</sub>@SiO<sub>2</sub> nanoparticles.

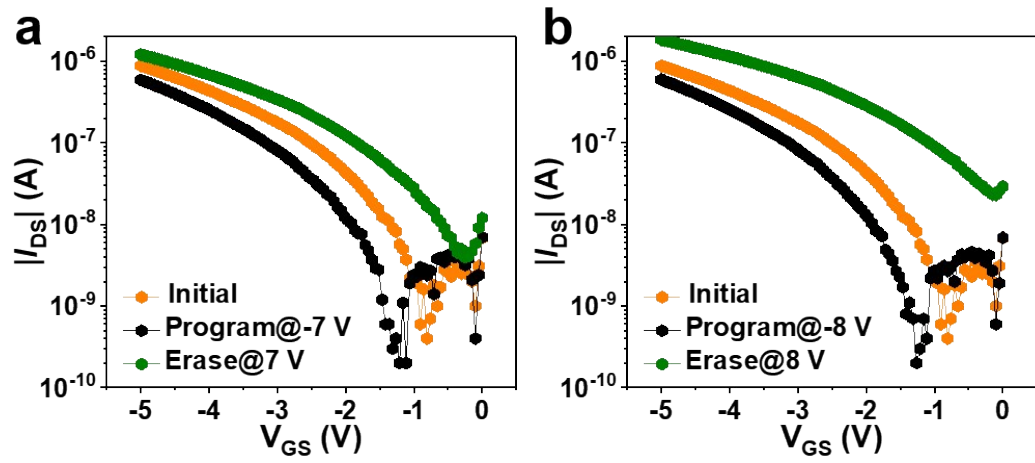

**Fig. S4.** The transfer curves of the memory device with doping concentration of 0.15 mg mL<sup>-1</sup> under different programming voltage or erasing voltage (1 s;  $V_{DS} = -5V$ ). (a) P: -7 V, E: +7 V; (b) P: -8 V, E: +8 V.

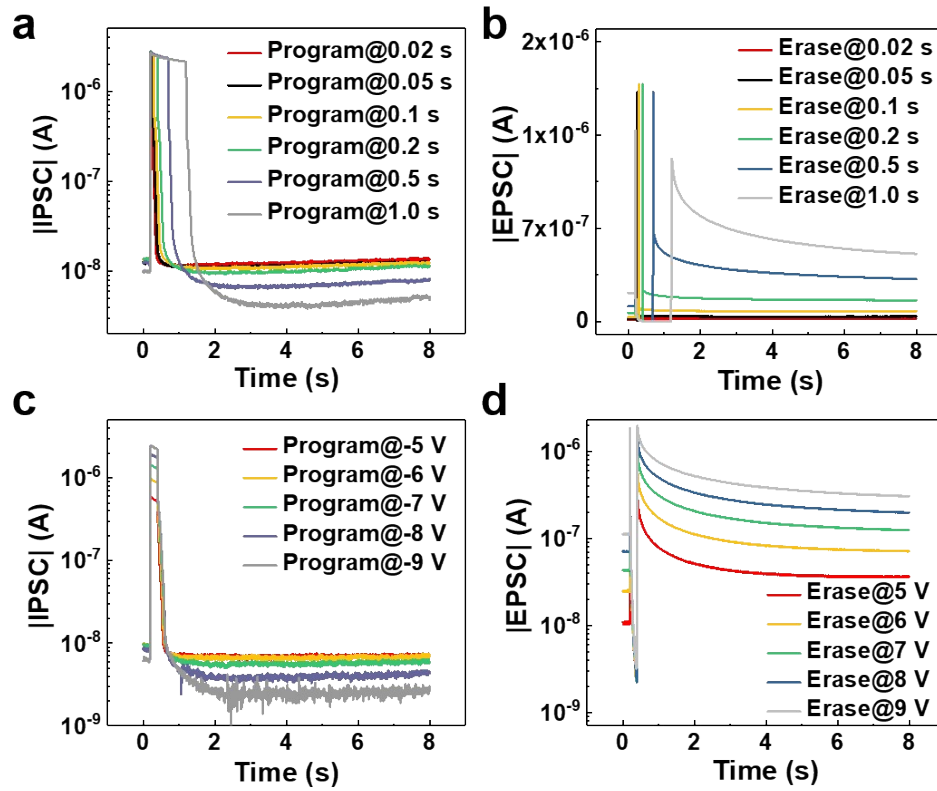

**Fig. S5.** The PSC generated by (a) programming operation (amplitude: -8 V, base voltage: -0.5 V,  $V_{DS} = -5$  V) and (b) erasing operation (amplitude: 8 V, base voltage: -0.5 V,  $V_{DS} = -5$  V) with diverse duration time from 0.02 to 1.0 s. The PSC generated by (c) programming operation and (d) erasing operation under the identical duration time (0.2 s) with diverse pulse amplitude from  $\pm 5$  V to  $\pm 9$  V.

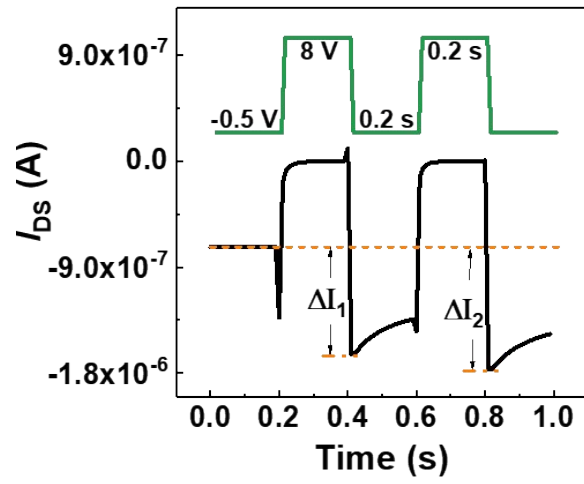

**Fig. S6.** The PPF behavior of UCNPs-based synaptic transistor triggered by a pair of presynaptic pulses (8 V, 0.2 s, interval: 0.2 s, base voltage: -0.5 V,  $V_{DS} = -5$  V).

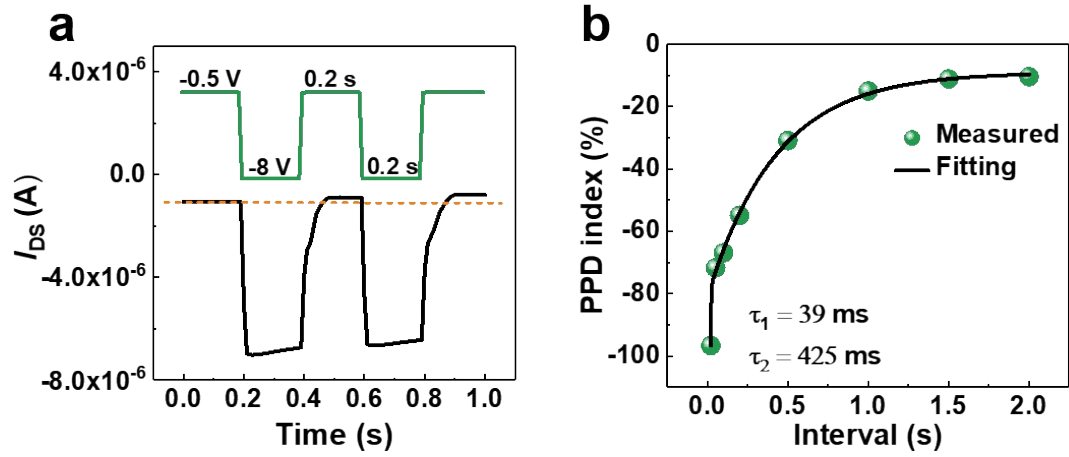

**Fig. S7.** (a) The PPF index under different time interval. (b) The PPD behavior of UCNPs-based synaptic transistor triggered by a pair of presynaptic pulses ( $-8$  V,  $0.2$  s, interval:  $0.2$  s, base voltage:  $-0.5$  V,  $V_{DS} = -5$  V).



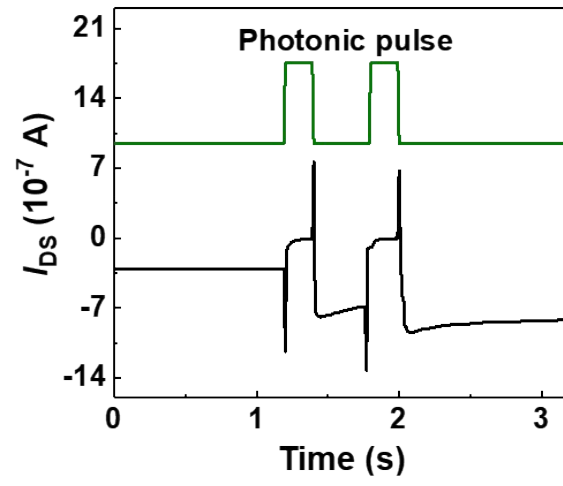

**Fig. S8.** The EPSC achieved by two successive light pulses.

Table S1. Summary of Previously Reported Flash Memory Performance.<sup>a</sup>

| semiconductor layer | tunneling dielectric layer | charge trapping layer | blocking dielectric layer             | initial threshold voltage (V) | operating voltage (V) | memory window (V) | $I_{on}$ (A)     | $I_{off}$ (A)     | $I_{on}/I_{off}$ | P/E cycle | ref |
|---------------------|----------------------------|-----------------------|---------------------------------------|-------------------------------|-----------------------|-------------------|------------------|-------------------|------------------|-----------|-----|
| BPE-PTCDI           | no                         | PCBM:N(PTPMA) 3       | SiO <sub>2</sub> (100nm)              | ~4                            | 50                    | ~30               | 10 <sup>-6</sup> | 10 <sup>-9</sup>  | ~10 <sup>3</sup> | 200       | 1   |
| pentacene           | PS                         | graphene quantum dots | SiO <sub>2</sub> (100nm)              | ~1                            | 60                    | ~35               | 10 <sup>-4</sup> | 10 <sup>-10</sup> | ~10 <sup>6</sup> | 100       | 2   |
| NDI20D-T2           | no                         | PS: [P3HT:PCBM]       | PMMA (280nm)                          | ~4                            | 50                    | ~3.5              | 10 <sup>-7</sup> | 10 <sup>-9</sup>  | ~10 <sup>2</sup> | 500       | 3   |
| NDI20D-T2           | no                         | PS: Tips-Pen          | PMMA (320nm)                          | ND                            | 55                    | ~10               | 10 <sup>-6</sup> | 10 <sup>-8</sup>  | ~10 <sup>2</sup> | 500       | 4   |
| pentacene           | no                         | PaMS/HfO <sub>2</sub> | Al <sub>2</sub> O <sub>3</sub> (20nm) | ND                            | 11                    | 1.5               | 10 <sup>-5</sup> | 10 <sup>-10</sup> | ~10 <sup>5</sup> | 2000      | 5   |
| C60                 | pV3D3                      | Al                    | pEGDMA                                | ~2                            | 15                    | 8                 | 10 <sup>-6</sup> | 10 <sup>-10</sup> | ~10 <sup>4</sup> | 1000      | 6   |
| pentacene           | no                         | PS/DPP                | SiO <sub>2</sub> (300nm)              | ~8                            | 100                   | ~30               | 10 <sup>-4</sup> | 10 <sup>-10</sup> | ~10 <sup>6</sup> | ND        | 7   |
| TPA-CN-TPE          | no                         | TPA-CN-TPE            | SiO <sub>2</sub> (300nm)              | ~40                           | 100                   | 42                | 10 <sup>-5</sup> | 10 <sup>-9</sup>  | ~10 <sup>4</sup> | ND        | 8   |
| P(NDI20D-T2)        | PMMA                       | PS-b-PPP              | PMMA (400nm)                          | ~11                           | 60                    | 26.7              | 10 <sup>-6</sup> | 10 <sup>-8</sup>  | ~10 <sup>2</sup> | 500       | 9   |

|           |                                |                         |                                       |      |    |      |           |            |             |      |           |
|-----------|--------------------------------|-------------------------|---------------------------------------|------|----|------|-----------|------------|-------------|------|-----------|
| pentacene | pV3D3                          | p(BDDA-co-HEA)          | pBDDA (19nm)                          | ~2   | 16 | ~3.3 | $10^{-7}$ | $10^{-11}$ | $\sim 10^4$ | 1000 | 10        |
| P3HT      | no                             | BCP/MAPbBr <sub>3</sub> | SiO <sub>2</sub> (100nm)              | ~8   | 60 | ND   | $10^{-7}$ | $10^{-10}$ | $\sim 10^3$ | ND   | 11        |
| IGZO      | Al <sub>2</sub> O <sub>3</sub> | ZnO                     | Al <sub>2</sub> O <sub>3</sub> (35nm) | ~1   | 12 | 7.1  | $10^{-5}$ | $10^{-11}$ | $\sim 10^6$ | 1000 | 12        |
| ITZO      | no                             | SiO <sub>x</sub>        | SiO <sub>2</sub> (20nm)               | 0.15 | 13 | 3.73 | $10^{-6}$ | $10^{-13}$ | $\sim 10^7$ | ND   | 13        |
| IGZO      | Al <sub>2</sub> O <sub>3</sub> | IGZO                    | Al <sub>2</sub> O <sub>3</sub> (35nm) | ~1   | 15 | 3.16 | $10^{-5}$ | $10^{-11}$ | $\sim 10^6$ | ND   | 14        |
| IGZO      | Al <sub>2</sub> O <sub>3</sub> | ZAO                     | Al <sub>2</sub> O <sub>3</sub> (60nm) | 0.1  | 10 | 5.74 | $10^{-6}$ | $10^{-10}$ | $\sim 10^4$ | ND   | 15        |
| pentacene | no                             | UCNPs                   | Al <sub>2</sub> O <sub>3</sub> (30nm) | ~2   | 8  | ~2.1 | $10^{-6}$ | $10^{-9}$  | $\sim 10^3$ | 500  | this work |

<sup>a</sup>ND,

no

data.

## Supporting Information references

- 1 Y.-C. Chiu, T.-Y. Chen, Y. Chen, T. Satoh, T. Kakuchi, W.-C. Chen, *ACS Appl. Mater. Interfaces*, 2014, **6**, 12780-12788.
- 2 Y. Ji, J. Kim, A. N. Cha, S. A. Lee, M. W. Lee, J. S. Suh, S. Bae, B. J. Moon, S. H. Lee, D. S. Lee, G. Wang, T. W. Kim, *Nanotechnology*, 2016, **27**, 145204.
- 3 W. Wang, K. L. Kim, S. M. Cho, J. H. Lee, C. Park, *ACS Appl. Mater. Interfaces*, 2016, **8**, 33863-33873.
- 4 C. Wu, W. Wang, J. Song, *Appl. Phys. Lett.*, 2016, **109**, 223301.
- 5 W. C. Xu, H. X. He, X. S. Jing, S. J. Wu, Z. Zhang, J. W. Gao, X. S. Gao, G. F. Zhou, X. B. Lu, J. M. Liu, *Appl. Phys. Lett.*, 2017, **111**, 063302.
- 6 S. Lee, H. Seong, S. G. Im, H. Moon, S. Yoo, *Nat. Commun.* 2017, **8**, 725.
- 7 N. Shi, D. Liu, X. Jin, W. Wu, J. Zhang, M. Yi, L. Xie, F. Guo, L. Yang, C. Ou, W. Xue, W. Huang, *Org. Electron.*, 2017, **49**, 218-225.
- 8 S. W. Cheng, T. Han, T. Y. Huang, Y. H. Chang Chien, C. L. Liu, B. Z. Tang, G. S. Liou, *ACS Appl. Mater. Interfaces*, 2018, **10**, 18281-18288.
- 9 G. Wang, X. Liu, W. Wang, *IEEE Electron Device Lett.*, 2018, **39**, 111-114.
- 10 C. Lee, K. Pak, J. Choi, M. J. Kim, B. J. Cho, S. G. Im, *Adv. Funct. Mater.*, 2020, 2004665.
- 11 Y. H. Chang, C. W. Ku, Y. H. Zhang, H. C. Wang, J. Y. Chen, *Adv. Funct. Mater.*, 2020, **30**, 2000764.
- 12 D. -D. Liu, W.-J. Liu, J. -X. Pei, L. -Y. Xie, J. Hou, X. Wu, S. -J. Ding, *Nanoscale Res. Lett.*, 2019, **14**, 363.
- 13 C. P. T. Nguyen, T. T. Trinh, J. Raja, A. H. T. Le, K. Jang, Y. -J. Lee, J. Yi, *Semicond. Sci. Technol.*, 2015, **30**, 075009.
- 14 W. -P. Zhang, S. -B. Qian, W. -J. Liu, S. -J. Ding, D. W. Zhang, *IEEE Electron Device Lett.*, 2015, **36**, 2466084.
- 15 S. Chen, X. -M. Cui, S. -J. Ding, Q. -Q. Sun, T. Nyberg, S. -L. Zhang, W. Zhang, *IEEE Electron Device Lett.*, 2013, **34**, 2266371.
